# Supplementary material
Source: PubMed Central journal article supplement (PMC10709632)
Supplement: 41422_2023_880_MOESM1_ESM.pdf [file 41422_2023_880_MOESM1_ESM.pdf]

## Supplementary Materials

### **A Broadly Neutralizing Antibody Inhibits SARS-CoV-2 Variants Through a Novel Mechanism of Disrupting Spike Trimer Integrity**

Yunping Ma<sup>1,2#</sup>, Qiyu Mao<sup>1#</sup>, Yingdan Wang<sup>1#</sup>, Zhaoyong Zhang<sup>3#</sup>, Jiali Chen<sup>1</sup>, Aihua Hao<sup>1</sup>, Palizhati Rehati<sup>1</sup>, Yanqun Wang<sup>3</sup>, Yumei Wen<sup>1</sup>, Lu Lu<sup>1</sup>, Zhenguo Chen<sup>1</sup>, Jincun Zhao<sup>3,4\*</sup>, Fan Wu<sup>2\*</sup>, Lei Sun<sup>1\*</sup>, Jinghe Huang<sup>1\*</sup>

<sup>1</sup>Key Laboratory of Medical Molecular Virology (MOE/NHC/CAMS) and Shanghai Institute of Infectious Disease and Biosecurity, Shanghai Public Health Clinical Center, Shanghai Fifth People's Hospital, Institutes of Biomedical Sciences, School of Basic Medical Sciences, Fudan University, Shanghai, China.

<sup>2</sup>Shanghai Immune Therapy Institute, Shanghai Jiao Tong University School of Medicine Affiliated Renji Hospital, Shanghai, China.

<sup>3</sup>State Key Laboratory of Respiratory Disease, National Clinical Research Center for Respiratory Disease, Guangzhou Institute of Respiratory Health, the First Affiliated Hospital of Guangzhou Medical University, Guangzhou, Guangdong, China;

<sup>4</sup>Shanghai Institute for Advanced Immunochemical Studies, School of Life Science and Technology, ShanghaiTech University, Shanghai, China

#These authors contributed equally: Yunping Ma, Qiyu Mao, Yingdan Wang, Zhaoyong Zhang

\*Correspondence: Jincun Zhao (zhaojincun@gird.cn), Fan Wu (wufan@fudan.edu.cn), Lei Sun (llsun@fudan.edu.cn), Jinghe Huang (Jinghehuang@fudan.edu.cn)

**Keywords:** COVID-19; SARS-CoV-2; Neutralizing Ab; Omicron BQ.1.1 and XBB.1.16

## 32 **Materials and Methods**

### 33 **Cell lines, participants**

34 Huh-7 cells and 293T cells were maintained in Dulbecco's Modified Eagle  
35 Medium (DMEM) supplemented with 10% fetal bovine serum (FBS), 1,000  
36 units/mL penicillin and 1,000 µg/mL streptomycin. All cell lines were cultured at  
37 37°C in 5% CO<sub>2</sub>. HEK293F suspension cells were maintained in serum free  
38 SMM 293-TII Expression Medium (Sino Biological Inc.), and cultured at 37°C in  
39 5% CO<sub>2</sub> with shaking at 120rpm. The study protocol was approved by the  
40 Ethics Committee of the Shanghai Public Health Clinical Center (YJ-2020-  
41 S021-01). Written informed consent approved by the Institutional Review Board  
42 was signed by all participants.

### 43 **RBD Proteins Generation**

44 Sequence of RBD protein (residues Arg319-phe541) were synthesized  
45 (GenScript), and cloned into pSecTag expression vectors with 8×His tag at C-  
46 terminal. HEK293F suspension cells were transiently transfected with  
47 recombinant RBD expression plasmid using Ez Trans reagent (Life-iLab,  
48 China). Five days after transfection, the media was collected by centrifugation,  
49 followed by purification using Ni Sepharose High performance (GE health)  
50 following manufacturers' protocol.

### 51 **Production of Pseudoviruses**

52 The spike genes of the wild-type SARS-CoV-2 strain and the Alpha (B.1.1.7),  
53 Beta (B.1.351), Delta (B.1.617.2), BA.1, BA.2.12.1, BA.2.75, and BA.5 variants  
54 were synthesized and cloned into the pcDNA3.1 vector. Plasmids containing  
55 the spike genes of the BA.2.75 and BA.5 subvariants were generated from the  
56 pcDNA3.1-BA.2.75-Spike and pcDNA3.1-BA.5-Spike plasmids, respectively,  
57 using site-directed mutagenesis. Oligonucleotides complementary to the  
58 template and containing the targeted substitutions were synthesized. Plasmids

59 with specific mutations in the spike gene were produced through PCR-based  
60 cloning. The pseudovirus plasmids and the pNL4-3.Luc.R-E- backbone plasmid  
61 were transiently co-transfected into HEK293T cells using Ez Trans transfection  
62 reagent (Life-iLab, China), and the culture medium was changed to fresh  
63 growth medium (DMEM supplemented with 10% FBS). After 48 hours, the  
64 supernatants were collected, stored at -80°C, and subsequently thawed for use  
65 in pseudovirus neutralization assays.

### 66 **Memory B cells sorting and antibody cloning, sequencing and production**

67 B cells labeling and sorting were performed as previously described<sup>1</sup>. In brief,  
68 peripheral blood from patients was collected, and peripheral blood  
69 mononuclear cells (PBMCs) were isolated by density gradient centrifugation  
70 with Ficoll-Paque. Memory B lymphocytes (CD19+IgA-IgD-IgM-) were  
71 negatively selected, suspended in interleukin-2 (IL-2), IL-21, and irradiated  
72 3T3-msCD40L cells. The cells were then sorted into 386-well plates, and  
73 supernatants were collected after 14 days to assess neutralizing activity against  
74 SARS-CoV-2. Antibody cloning and sequencing were performed as previously  
75 reported<sup>2-4</sup>. The somatic hypermutation rate (SHM) and CDRH3 sequence were  
76 determined using IMGTV-QUEST. The variable regions of the heavy chain (VH)  
77 and light chain (VL) of the monoclonal antibodies (mAbs) were inserted into  
78 IgG1 antibody expression vectors. The heavy chain and light chain expression  
79 plasmids were transiently co-transfected into HEK293F cells, supernatants  
80 were harvested after 5 days, and antibodies were purified using protein G  
81 beads.

### 82 **Pseudovirus Neutralization assay**

83 The neutralization assay was performed as previously described<sup>5,6</sup>. In brief,  
84 Huh-7 cells were seeded in 96-well plates with growth medium (DMEM  
85 supplemented with 10% FBS) 12 hours before pseudovirus infection.  
86 Monoclonal antibodies (10 µL of 5-fold serial dilutions in growth medium) were

87 incubated with pseudovirus (40  $\mu$ L) for 30 minutes at 37°C and then added to  
88 the cells. Background control wells received 50  $\mu$ L of growth medium, and virus  
89 control wells received 10  $\mu$ L of growth medium and 40  $\mu$ L of pseudovirus. After  
90 24 hours of infection, the cells were replenished with 150  $\mu$ L of fresh growth  
91 medium. Following an additional 24 hours of incubation, the supernatants were  
92 aspirated, and the Huh-7 cells were lysed to assess luciferase expression  
93 (PerkinElmer EnSight). The inhibition rate was calculated using the following  
94 equation:

$$95 \quad \%Neut = \frac{(\text{average RLU of virus control} - \text{RLU of sample})}{(\text{average RLU of virus control} - \text{average RLU of background})} * 100$$

96 Neutralization IC<sub>50</sub> were determined by a “Sigmoidal dose-response with  
97 absolute IC<sub>50</sub> IC<sub>80</sub>” regression in GraphPad Prism 9.

## 98 **ELISA**

99 To assess the binding of monoclonal antibodies to the receptor-binding domain  
100 (RBD) of SARS-CoV-2 variants, recombinant RBD proteins were immobilized  
101 on 96-well ELISA plates at 1-3  $\mu$ g/mL in 100  $\mu$ L at 4°C overnight. After blocking  
102 with non-fat milk in PBS, serial 5-fold dilutions of the monoclonal antibodies  
103 were added to the plates and incubated for 60 minutes at 37°C. The plates were  
104 washed with PBST, and a secondary antibody (goat anti-human IgG-HRP) was  
105 added. ABTS was added, and antibody binding was determined by measuring  
106 absorbance at 405 nm using a microplate reader.

## 107 **Biolayer interferometry (BLI) binding assay**

108 Antibody binding affinities were determined using an Octet-RED96 system  
109 (FortéBio) with NTA biosensors. PBST (0.05% Tween-20 in PBS) was used as  
110 the running buffer. Antibodies and proteins were diluted in PBST beforehand.  
111 Recombinant RBDs of the variants were captured on the NTA sensor at 10  
112  $\mu$ g/mL. After a baseline measurement for 200 seconds, the sensors were  
113 immersed in 3-fold serial dilutions of the monoclonal antibodies for 300 seconds.

114 This was followed by immersion in buffer alone for 300 seconds. After each  
115 association and dissociation cycle, the sensors were regenerated using 10 mM  
116 glycine-HCl (pH 1.5). The buffer well served as a negative control, and  
117 nonspecific binding was normalized by subtracting the signal from the dataset.  
118 The binding affinity of the monoclonal antibodies was calculated using a 1:1  
119 binding model with the FortéBio Data Analysis 8.1 software.

## 120 **ACE2 competition binding assay by BLI**

121 The recombinant human angiotensin-converting enzyme 2 (hACE2) protein  
122 used in this study comprised residues Met1 to Ser740 fused to the Fc portion  
123 of human IgG1 at the C-terminus. For the ACE2 competition assay, hACE2-Fc  
124 was loaded onto an anti-human Fc (AHC) biosensor for 300 seconds at 20  
125 µg/mL. After a baseline measurement for 200 seconds, the biosensors were  
126 exposed to 50 µg/mL of an IgG1 isotype control antibody to block any  
127 unoccupied sites on the sensors for 600 seconds. The biosensors were then  
128 added to wells containing a pre-mixture of 100 nM RBD protein and 600 nM  
129 monoclonal antibodies for 300 seconds. The binding response was recorded at  
130 each step. An irrelevant antibody was used as a negative control, and hACE2-  
131 Fc alone was used as a positive control competitor.

## 132 **Antibody-dependent enhancement of SARS-CoV-2 variants infection**

133 To assess antibody-dependent enhancement (ADE) of SARS-CoV-2 variant  
134 infection, we utilized a pseudotyped virus assay as previously described.<sup>7</sup>  
135 Pseudotyped viruses expressing the spike proteins of SARS-CoV-2 variants  
136 were incubated with serial 5-fold dilutions of antibody for 1 hour at 37°C. The  
137 antibody-pseudovirus mixtures containing approximately 100,000 relative light  
138 units (RLU) were then added to Raji B cells adhered to poly-L-lysine-coated 96-  
139 well plates. Following 24 hours of incubation at 37°C, the supernatant was  
140 replaced with fresh medium. After an additional 48 hours, luciferase substrate  
141 was added to lyse the cells and quantify RLU using a microplate reader per

142 the manufacturer's protocol (Promega).

### 143 **Animal experiments**

144 The prophylactic and therapeutic efficacy of the monoclonal antibody 6i18 was  
145 evaluated in vivo using 6- to 8-week-old BALB/c mice. As previously described<sup>8</sup>,  
146 mice received either 200 µg of 6i18 (10 mg/kg) intraperitoneally (i.p.) or 20 µg  
147 of 6i18 (1 mg/kg) intranasally (i.n.), either 24 hours before or after challenge  
148 with  $1 \times 10^5$  focus-forming units (FFU) of the SARS-CoV-2 XBB.1 variant. Mice  
149 treated with phosphate-buffered saline (PBS) and challenged with an  
150 equivalent dose of the XBB.1 variant served as negative controls. The  
151 pulmonary viral burden was assessed by collecting lung samples 48 hours post-  
152 infection and quantifying infectious virus using a focus formation assay (FFA).

### 153 **Formation of XBB S-6i18 complex**

154 The purified XBB S trimer was mixed with 6i18 at a 1:1.5 molar ratio, incubated  
155 at 4°C for 1h, and further purified by gel filtration. The peak fraction of the gel  
156 filtration was further analyzed by negative stain and cryo-EM.

### 157 **Cryo-EM data collection and image processing**

158 Cryo-EM data of XBB.1 S with 6i18 antibody was collected using TITAN Krios  
159 G4 transmission electron microscope (Thermo Fisher) operating at 300kV  
160 equipped with Falcon 4i and Selectrics X Imaging filter with a slit width of 20eV.  
161 EER Movie stacks in AFIS mode were automatically collected using EPU  
162 software in super resolution mode at a nominal magnification 130,000x,  
163 physical pixel size of 0.932Å, a defocus range of -1.0 µm to -3.0 µm, dose  
164 fractioned to 1080 frames with a total dose of  $\sim 50e^-/\text{Å}^2$ .

165 All micrographs were binned 2x2, dose weighted and motion corrected in Relion  
166 v3.1<sup>9</sup>, then the contrast transfer function (CTF) was estimated with Gctf<sup>10</sup>. All  
167 motion corrected micrographs were imported to cryoSPARC v4.0.3 for further

168 patched CTF-estimation and Manually Curate Exposures<sup>11</sup>. Bad exposures  
169 were discarded based upon ice condition, astigmatism and estimated resolution,  
170 and a total of 2,915 micrographs were selected for further blob picking, template  
171 picking and 2D classification. Good particles were selected for ab-initio, yielding  
172 a map of XBB.1 monomer's NTD, RBD, complexed with one Fab, while density  
173 other domains is absent. The resulting volume were used for Create Templates  
174 and a new round of template picking, then particles from three rounds of picking  
175 were merged and de-duplicated and a total particle stack of 662,816 particles  
176 were imported to Relion through pyem package<sup>12</sup>. One round of 3D  
177 classification of global search yielded 518,597 good particles, and exported  
178 back to cryoSPARC for Local Refine to a final resolution of 3.34 Å, the map was  
179 postprocessed with deepEMhancer<sup>13</sup>. 3DFSC Program Suite Version 3.0<sup>14</sup> was  
180 used to estimate the resolution. Maps are evaluated in UCSF Chimera<sup>15</sup>. The  
181 above data processing procedures are summarized in Supplementary  
182 information Figure 2.

### 183 **Model building and refinement**

184 XBB.1 S monomer model was fitted with cryoEM model of Omicron S (PDB ID:  
185 7WOW), and 6i18 antibody model was generated with Protein Folding function  
186 using Hermite® Platform (<https://hermite.dp.tech>, DP Technology) and then  
187 fitted into the density with UCSF Chimera. Further manual adjustments were  
188 performed in COOT and after which, real space refinement was carried out in  
189 PHENIX<sup>16,17</sup>. Model validation was performed using MolProbity. Figures were  
190 prepared using UCSF Chimera and UCSF ChimeraX. The statistics of model  
191 refinement and data collection are listed in Supplementary information Table  
192 S2.

### 193 **References**

- 194 1 Huang, J. *et al.* Isolation of human monoclonal antibodies from peripheral blood B cells.  
195 *Nature protocols* **8**, 1907-1915, doi:10.1038/nprot.2013.117 (2013).  
196 2 Huang, J. *et al.* Identification of a CD4-Binding-Site Antibody to HIV that Evolved Near-

197 Pan Neutralization Breadth. *Immunity* **45**, 1108-1121, doi:10.1016/j.immuni.2016.10.027  
198 (2016).

199 3 Huang, J. *et al.* Broad and potent HIV-1 neutralization by a human antibody that binds  
200 the gp41-gp120 interface. *Nature* **515**, 138-142, doi:10.1038/nature13601 (2014).

201 4 Huang, J. *et al.* Broad and potent neutralization of HIV-1 by a gp41-specific human  
202 antibody. *Nature* **491**, 406-412, doi:10.1038/nature11544 (2012).

203 5 Wang, Y. *et al.* Combating the SARS-CoV-2 Omicron (BA.1) and BA.2 with potent  
204 bispecific antibodies engineered from non-Omicron neutralizing antibodies. *Cell*  
205 *discovery* **8**, 104, doi:10.1038/s41421-022-00463-6 (2022).

206 6 Wang, Y. *et al.* Novel sarbecovirus bispecific neutralizing antibodies with exceptional  
207 breadth and potency against currently circulating SARS-CoV-2 variants and  
208 sarbecoviruses. *Cell discovery* **8**, 36, doi:10.1038/s41421-022-00401-6 (2022).

209 7 Wu, F. *et al.* Antibody-dependent enhancement (ADE) of SARS-CoV-2 infection in  
210 recovered COVID-19 patients: studies based on cellular and structural biology analysis.  
211 *medRxiv*, 2020.2010.2008.20209114, doi:10.1101/2020.10.08.20209114 (2020).

212 8 Wang, Y. *et al.* Biparatopic antibody BA7208/7125 effectively neutralizes SARS-CoV-2  
213 variants including Omicron BA.1-BA.5. *Cell discovery* **9**, 3, doi:10.1038/s41421-022-  
214 00509-9 (2023).

215 9 Zivanov, J. *et al.* New tools for automated high-resolution cryo-EM structure  
216 determination in RELION-3. *eLife* **7**, doi:10.7554/eLife.42166 (2018).

217 10 Zhang, K. Gctf: Real-time CTF determination and correction. *Journal of structural biology*  
218 **193**, 1-12, doi:10.1016/j.jsb.2015.11.003 (2016).

219 11 Punjani, A., Rubinstein, J. L., Fleet, D. J. & Brubaker, M. A. cryoSPARC: algorithms for rapid  
220 unsupervised cryo-EM structure determination. *Nature methods* **14**, 290-296,  
221 doi:10.1038/nmeth.4169 (2017).

222 12 Asarnow, D., Palovcak, E., Cheng, Y. UCSF pyem v0.5. Zenodo  
223 <https://doi.org/10.5281/zenodo.3576630> (2019).  
224 doi:<https://doi.org/10.5281/zenodo.3576630>

225 13 Sanchez-Garcia, R. *et al.* DeepEMhancer: a deep learning solution for cryo-EM volume  
226 post-processing. *Communications biology* **4**, 874, doi:10.1038/s42003-021-02399-1  
227 (2021).

228 14 Tan, Y. Z. *et al.* Addressing preferred specimen orientation in single-particle cryo-EM  
229 through tilting. *Nature Methods* **14**, 793-796, doi:10.1038/nmeth.4347 (2017).

230 15 Pettersen, E. F. *et al.* UCSF Chimera--a visualization system for exploratory research and  
231 analysis. *J Comput Chem* **25**, 1605-1612, doi:10.1002/jcc.20084 (2004).

232 16 Emsley, P., Lohkamp, B., Scott, W. G. & Cowtan, K. Features and development of Coot.  
233 *Acta Crystallogr D Biol Crystallogr* **66**, 486-501, doi:10.1107/s0907444910007493 (2010).

234 17 Afonine, P. V. *et al.* Real-space refinement in PHENIX for cryo-EM and crystallography.  
235 *Acta Crystallogr D Struct Biol* **74**, 531-544, doi:10.1107/s2059798318006551 (2018).

236



237 **Table S1. Neutralization of 6i18 and S309 against a panel of 47 SARS-CoV-**  
 238 **2 circulating single mutants.**

| SARS2 mutants | Fold change* |       |
|---------------|--------------|-------|
|               | 6i18         | S309  |
| WT            | 1.0          | 1.0   |
| T307E         | 0.1          | 29.2  |
| E309D         | >977         | >2252 |
| V341I         | 6.4          | 4.3   |
| F342L         | >977         | >2252 |
| V367F         | 1.6          | 4.4   |
| S371F         | 5.2          | >2252 |
| A372T         | 388.2        | >2252 |
| S373P         | 0.2          | 0.2   |
| F374A         | 0.4          | 15.4  |
| S375A         | 0.3          | 5.5   |
| T376A         | 0.2          | 3.2   |
| S383A         | 1.4          | 3.1   |
| T385A         | 0.0          | 4.1   |
| R408I         | 2.3          | 3.5   |
| K417N         | 2.6          | 1.1   |
| D427A         | 9.0          | 2.5   |
| D428A         | 0.1          | 2.4   |
| A435S         | 1.5          | 4.7   |
| N439K         | 0.3          | 3.0   |
| G446V         | 20.7         | 1.9   |
| N450G         | 0.5          | 2.6   |
| L452R         | 1.0          | 5.1   |
| K458N         | 0.1          | 1.8   |
| I472V         | 7.6          | 1.1   |
| A475V         | 0.2          | 4.0   |
| G476S         | 0.5          | 3.7   |
| S477A         | 4.4          | 4.4   |
| T478K         | 0.8          | 4.0   |
| V483A         | 3.8          | 3.7   |
| E484A         | 0.2          | 0.9   |
| E484Q         | 0.6          | 3.2   |
| G485A         | 0.5          | 0.5   |
| G485R         | 0.4          | 2.8   |
| F486A         | 0.2          | 0.9   |
| F486L         | 1.7          | 2.7   |
| F490L         | 0.6          | 3.4   |
| P491A         | >977         | >2252 |
| S494P         | 0.6          | 3.5   |
| N501Y         | 0.2          | 1.6   |
| Y508H         | 3.3          | 1.8   |
| A570D         | 0.1          | 3.1   |
| A570S         | 0.2          | 6.0   |
| T572F         | 0.1          | 1.7   |
| A575S         | 0.7          | 3.1   |
| D614G         | 14.7         | 2.1   |
| P681H         | 0.8          | 0.8   |
| P681R         | 4.2          | 13.7  |
| T716I         | 0.2          | 7.0   |
| A831V         | 3.9          | 2.3   |
| D950N         | 0.5          | 5.9   |
| S982A         | 4.8          | 0.4   |

277  
 278 \*Fold change is calculated as the IC50 of the mutant/the IC50 of WT. Mutants that decreased  
 279 the sensitivity of 6i18 with fold change values between 10-100 are highlighted in yellow, and  
 280 fold change values >100 are highlighted in red.

281  
282

**Table S2. Cryo-EM data collection and refinement statistics.**

|                                              | XBB-S-6i18 complex |
|----------------------------------------------|--------------------|
| <b>Data collection and processing</b>        |                    |
| Magnification                                | 81000              |
| Voltage (kV)                                 | 300                |
| Total dose (e <sup>-</sup> /Å <sup>2</sup> ) | 58                 |
| Defocus range (μm)                           | -1.2 to -2.5       |
| Pixel size (Å)                               | 0.82               |
| Symmetry imposed                             | C1                 |
| Final particles (no.)                        | 597,461            |
| Map resolution (Å)                           | 3.3                |
| <b>Refinement</b>                            |                    |
| <b>R.m.s. deviations</b>                     |                    |
| Bond lengths (Å)                             | 0.001              |
| Bond angles (°)                              | 0.398              |
| <b>Validation</b>                            |                    |
| MolProbity score                             | 2.45               |
| Clashscore                                   | 10.22              |
| Rotamer outlier (%)                          | 3.78               |
| <b>Ramachandran plot</b>                     |                    |
| Favored (%)                                  | 92.04              |
| Allowed (%)                                  | 7.96               |
| Disallowed (%)                               | 0.00               |
| <b>EMDB</b>                                  | <b>36322</b>       |
| <b>PDB</b>                                   | <b>8JIO</b>        |

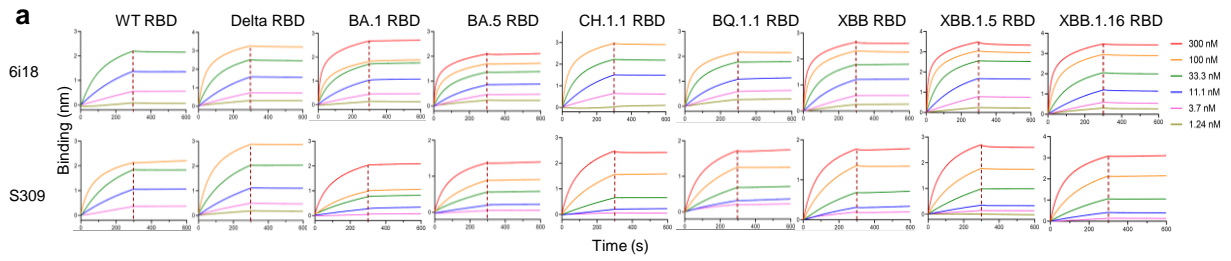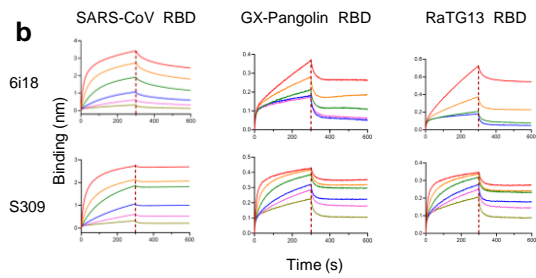

283

284 **Supplementary Fig. S1. Binding affinity of 6i18.** Binding affinities of 6i18 and  
 285 S309 to the RBDs of (a) SARS-CoV-2 variants as well as (b) other  
 286 sarbecoviruses as determined by BLI.

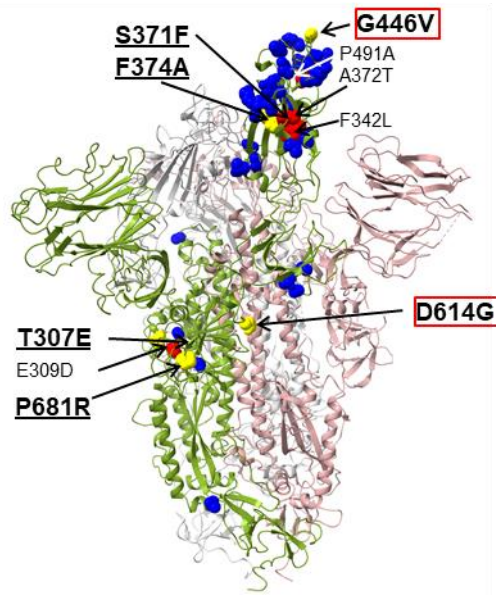

287 **Supplementary Fig. S2.** Three-dimensional representation of 47 SARS-CoV-  
 288 2 circulating single mutants. Residues with 10-100 fold neutralization changes  
 289 are highlighted in yellow, while residues with fold changes exceeding 100 are  
 290 colored red. Unaffected residues are displayed in blue. Squares highlight  
 291 mutants that specifically decreased 6i18 neutralization. Mutants conferring  
 292 decreased sensitivity or resistance to S309 neutralization are underlined.  
 293

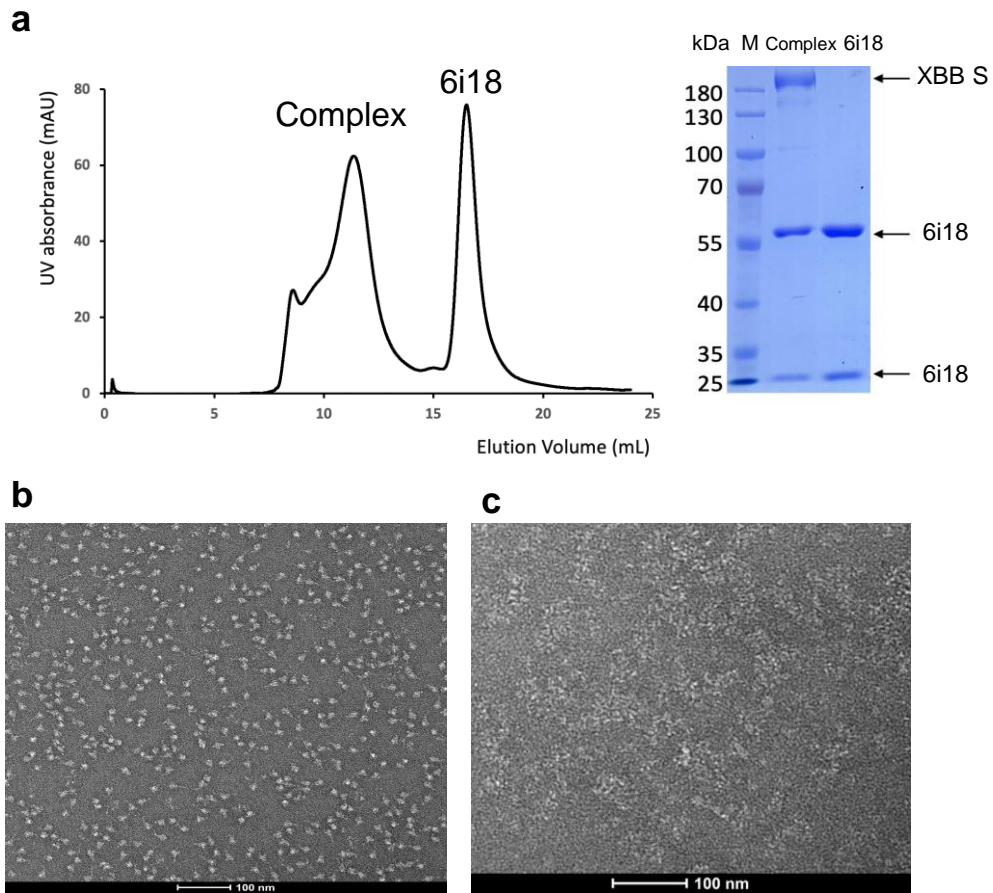

294

295 **Supplementary Fig. S3. Negative staining EM image of SARS-CoV-2 XBB**

296 **S in complex with 6i18.** (a) Gel-filtration purification and SDS-PAGE of SARS-

297 CoV-2 XBB S complexed with 6i18 complex. Negative staining EM images of

298 (b) SARS-CoV-2 XBB S trimer alone and (c) S-6i18 complex, showing that

299 binding of 6i18 disassembles SARS-CoV-2 XBB S trimer.

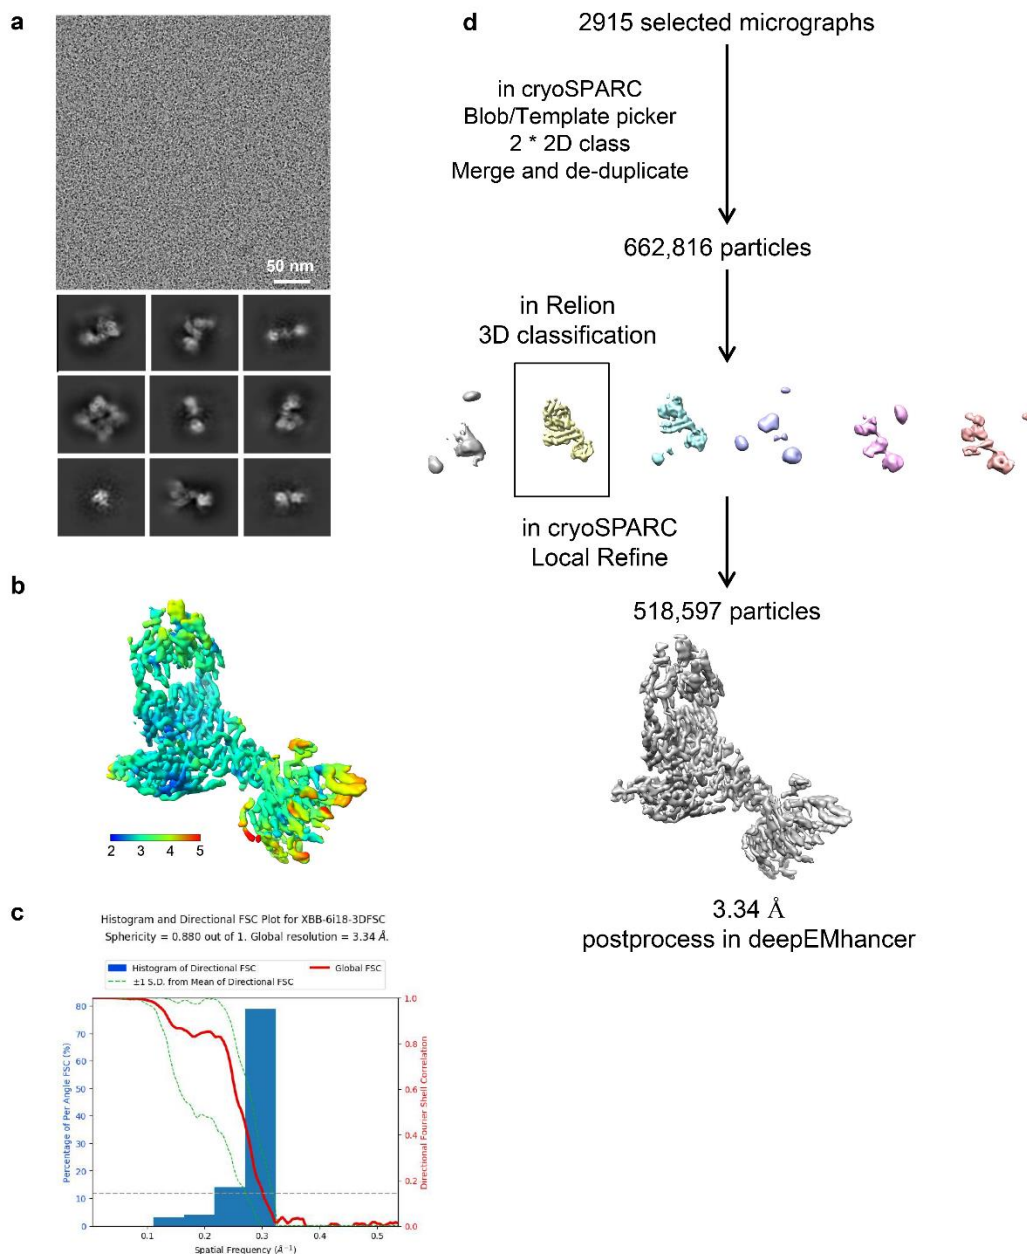

300

301

**Supplementary Fig. S4. Cryo-EM data collection and processing of SARS-**

302

**CoV-2 XBB S in complex with 6i18. (a) Representative electron micrograph**

303

**and 2D classification results of 6i18 bound SARS-CoV-2 S. (b) Local resolution**

304

**map for the reconstruction of NTD-RBD-6i18. (c) Histogram and FSC plot were**

305

**generated using 3DFSC for the complex. The 0.143 cutoff is indicated by a**

306

**horizontal dashed line. (d) Data processing flowchart of 6i18-bound SARS-**

307

**CoV-2 XBB S.**

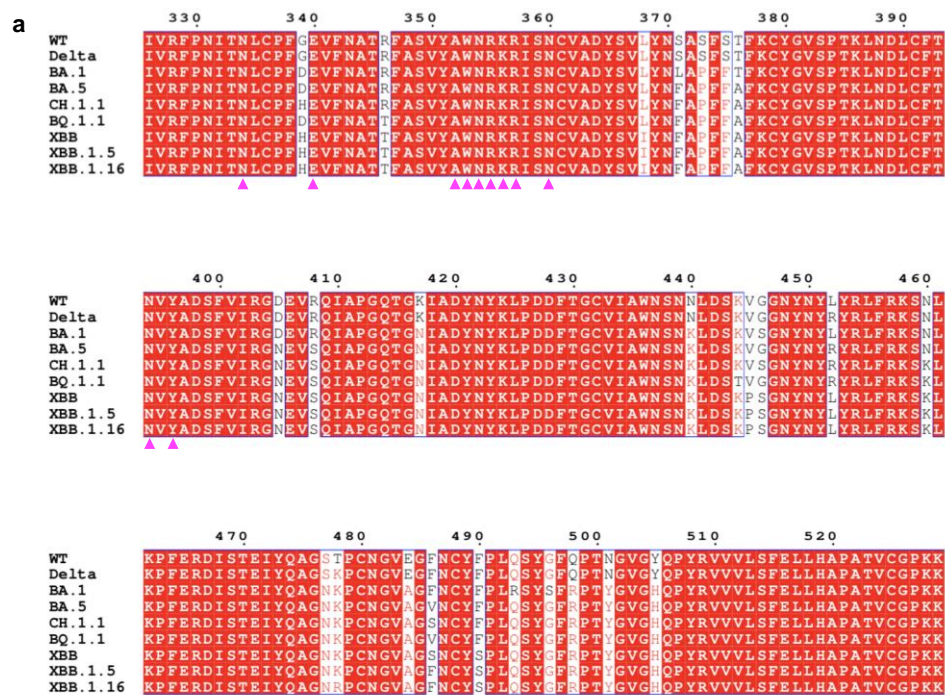

**b**

| XBB residues | Conservation (%) |
|--------------|------------------|
| N334         | 96.5             |
| E340         | 96.3             |
| A352         | 96.3             |
| W353         | 96.3             |
| N354         | 96.2             |
| R355         | 95.5             |
| K356         | 94.9             |
| R357         | 95.4             |
| N360         | 95.3             |
| N394         | 94.8             |
| Y396         | 95.1             |
| F464         | 91.6             |
| R466         | 91.8             |
| I468         | 92.0             |
| S469         | 91.9             |
| T470         | 91.8             |
| E471         | 91.9             |
| E516         | 94.2             |
| A520         | 94.4             |
| P521         | 94.8             |
| T523         | 95.5             |
| F562         | 98.7             |

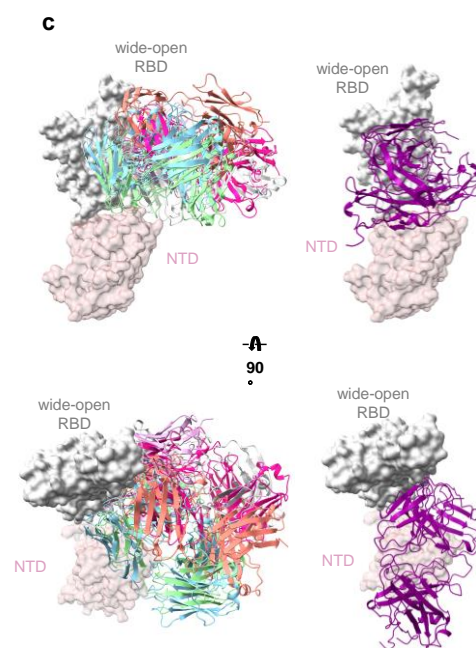

**d**

| mAb ID     | IC <sub>50</sub> (μg/mL)<br>XBB.1.16 |
|------------|--------------------------------------|
| 6i18       | 0.0863                               |
| N-612-056  | 17.4                                 |
| FD20       | 43.2                                 |
| COVOX-45   | 2.377                                |
| WRAIR-2057 | 1.674                                |
| S2H97      | 28.6                                 |
| ION-300    | 0.820                                |

— 6i18  
— N-612-056  
— FD20  
— COVOX-45  
— WRAIR-2057  
— S2H97  
— ION-300

308

309 **Supplementary Fig. S5. 6i18 epitope on S RBD.** (a) Sequence alignment of  
 310 WT, Delta, BA.1, BA.5, CH.1.1, BQ.1.1, XBB, XBB.1.5 and XBB.1.16 RBD.  
 311 Conserved amino acids are highlighted as red. Residues involved in 6i18  
 312 binding are marked with magenta triangles. (b) Conservation rates of the  
 313 residues involved in 6i18 binding across SARS-CoV-2 variants ranging from  
 314 Jan 2020 through present circulating strains. (c) Structural comparison of 6i18

315 complexed with XBB S RBD and H-RBD class antibodies N-612-056 (PDBID:  
316 7S0B), FD20 (PDBID: 7CYV), COVOX-45 (PDBID: 7PRY), WRAIR-2057  
317 (PDBID: 7N4I), S2H97 (PDBID: 7M7W), ION-300 (PDBID: 7BNV) modelled  
318 onto XBB S RBD. **(d)** A comparison of neutralization activities of 6i18 and  
319 antibodies from the H-RBD class against the XBB.1.16 variant.
